# Supplementary material
Source: PubMed Central journal article supplement (PMC9887535)
Supplement: jamapediatr-e225629-s001.pdf [file jamapediatr-e225629-s001.pdf]

## Supplementary Online Content

Dhanasekara CS, Ancona D, Cortes L, et al. Association between autism spectrum disorders and cardiometabolic diseases: a systematic review and meta-analysis. *JAMA Pediatr*. Published online January 30, 2023. doi:10.1001/jamapediatrics.2022.5629

**eTable 1.** PRISMA 2020 Checklist

**eTable 2.** MOOSE Checklist

**eTable 3.** Keywords and Keyword Combinations Used to Screen the PubMed, Scopus, Web of Science, ProQuest, Embase, and Ovid Electronic Databases

**eTable 4.** Characteristics of the Studies Meeting Eligibility for the Systematic Review and Primary Meta-analyses

**eTable 5.** Demographic Summaries of Individual Meta-analyzed Samples

**eTable 6.** Results of the Random-Effects Meta-regression Analyses That Examined the Heterogeneity and Moderator Effects of the Association Between Autism and Relative Risk of Diabetes

**eTable 7.** Summary of Assessments for Publication Bias and Adjusted Outcomes

**eTable 8.** Results of the Random-Effects Meta-regression Analyses That Examined the Heterogeneity and Moderator Effects of the Association Between Autism and Relative Risk of Hypertension

**eTable 9.** List of Excluded Studies

**eFigure 1.** Funnel Plot Depicting Publication Bias and Imputed Effect Sizes to Correct for Publication Bias for Cardiometabolic Risk Factors

**eFigure 2.** Results of Random-Effects Meta-analysis Examining the Relative Risk of Diabetes With Subgroup Analysis for Age Groups

**eFigure 3.** Results of Random-Effects Meta-analysis Examining the Mean Difference of Fasting Blood Glucose Levels Between Autistic and Nonautistic Individuals

**eFigure 4.** Results of Random-Effects Meta-analysis Examining the Relative Risk Hypertension With Subgroup Analysis for Age Groups

**eFigure 5.** Results of Random-Effects Meta-analysis Examining the Mean Difference of High-Density Cholesterol Levels Between Autistic and Nonautistic Individuals

**eFigure 6.** Results of Random-Effects Meta-analysis Examining the Mean Difference of Low-Density Cholesterol Levels Between Autistic and Nonautistic Individuals

**eFigure 7.** Results of Random-Effects Meta-analysis Examining the Mean Difference of Total Cholesterol Levels Between Autistic and Nonautistic Individuals

**eReferences**

**eTable 1. PRISMA 2020 Checklist**

| Section and Topic       | Item # | Checklist item                                                                                                                                                                                                                                                                                       | Location where item is reported |
|-------------------------|--------|------------------------------------------------------------------------------------------------------------------------------------------------------------------------------------------------------------------------------------------------------------------------------------------------------|---------------------------------|
| <b>TITLE</b>            |        |                                                                                                                                                                                                                                                                                                      |                                 |
| Title                   | 1      | Identify the report as a systematic review.                                                                                                                                                                                                                                                          | 1                               |
| <b>ABSTRACT</b>         |        |                                                                                                                                                                                                                                                                                                      |                                 |
| Abstract                | 2      | See the PRISMA 2020 for Abstracts checklist.                                                                                                                                                                                                                                                         | 3-4                             |
| <b>INTRODUCTION</b>     |        |                                                                                                                                                                                                                                                                                                      |                                 |
| Rationale               | 3      | Describe the rationale for the review in the context of existing knowledge.                                                                                                                                                                                                                          | 5                               |
| Objectives              | 4      | Provide an explicit statement of the objective(s) or question(s) the review addresses.                                                                                                                                                                                                               | 6                               |
| <b>METHODS</b>          |        |                                                                                                                                                                                                                                                                                                      |                                 |
| Eligibility criteria    | 5      | Specify the inclusion and exclusion criteria for the review and how studies were grouped for the syntheses.                                                                                                                                                                                          | Figure 1                        |
| Information sources     | 6      | Specify all databases, registers, websites, organisations, reference lists and other sources searched or consulted to identify studies. Specify the date when each source was last searched or consulted.                                                                                            | 6                               |
| Search strategy         | 7      | Present the full search strategies for all databases, registers and websites, including any filters and limits used.                                                                                                                                                                                 | 6, eTable 3                     |
| Selection process       | 8      | Specify the methods used to decide whether a study met the inclusion criteria of the review, including how many reviewers screened each record and each report retrieved, whether they worked independently, and if applicable, details of automation tools used in the process.                     | 6                               |
| Data collection process | 9      | Specify the methods used to collect data from reports, including how many reviewers collected data from each report, whether they worked independently, any processes for obtaining or confirming data from study investigators, and if applicable, details of automation tools used in the process. | 7                               |
| Data items              | 10a    | List and define all outcomes for which data were sought. Specify whether all results that were compatible with each outcome domain in each study were sought (e.g. for all measures, time points, analyses), and if not, the methods used to decide which results to                                 | 7                               |

|                               |     |                                                                                                                                                                                                                                                                   |     |
|-------------------------------|-----|-------------------------------------------------------------------------------------------------------------------------------------------------------------------------------------------------------------------------------------------------------------------|-----|
|                               |     | collect.                                                                                                                                                                                                                                                          |     |
|                               | 10b | List and define all other variables for which data were sought (e.g. participant and intervention characteristics, funding sources). Describe any assumptions made about any missing or unclear information.                                                      | 7   |
| Study risk of bias assessment | 11  | Specify the methods used to assess risk of bias in the included studies, including details of the tool(s) used, how many reviewers assessed each study and whether they worked independently, and if applicable, details of automation tools used in the process. | 6-7 |
| Effect measures               | 12  | Specify for each outcome the effect measure(s) (e.g. risk ratio, mean difference) used in the synthesis or presentation of results.                                                                                                                               | 7-8 |
| Synthesis methods             | 13a | Describe the processes used to decide which studies were eligible for each synthesis (e.g. tabulating the study intervention characteristics and comparing against the planned groups for each synthesis (item #5)).                                              | 7   |
|                               | 13b | Describe any methods required to prepare the data for presentation or synthesis, such as handling of missing summary statistics, or data conversions.                                                                                                             | 7   |
|                               | 13c | Describe any methods used to tabulate or visually display results of individual studies and syntheses.                                                                                                                                                            | 7-8 |
|                               | 13d | Describe any methods used to synthesize results and provide a rationale for the choice(s). If meta-analysis was performed, describe the model(s), method(s) to identify the presence and extent of statistical heterogeneity, and software package(s) used.       | 7-8 |
|                               | 13e | Describe any methods used to explore possible causes of heterogeneity among study results (e.g. subgroup analysis, meta-regression).                                                                                                                              | 8   |
|                               | 13f | Describe any sensitivity analyses conducted to assess robustness of the synthesized results.                                                                                                                                                                      | 7-8 |
| Reporting bias assessment     | 14  | Describe any methods used to assess risk of bias due to missing results in a synthesis (arising from reporting biases).                                                                                                                                           | 6-8 |
| Certainty assessment          | 15  | Describe any methods used to assess certainty (or confidence) in the body of                                                                                                                                                                                      | 8   |

|                               |     |                                                                                                                                                                                                                                                                                      |                    |
|-------------------------------|-----|--------------------------------------------------------------------------------------------------------------------------------------------------------------------------------------------------------------------------------------------------------------------------------------|--------------------|
|                               |     | evidence for an outcome.                                                                                                                                                                                                                                                             |                    |
| <b>RESULTS</b>                |     |                                                                                                                                                                                                                                                                                      |                    |
| Study selection               | 16a | Describe the results of the search and selection process, from the number of records identified in the search to the number of studies included in the review, ideally using a flow diagram.                                                                                         | 8, Figure 1        |
|                               | 16b | Cite studies that might appear to meet the inclusion criteria, but which were excluded, and explain why they were excluded.                                                                                                                                                          | eTable 9           |
| Study characteristics         | 17  | Cite each included study and present its characteristics.                                                                                                                                                                                                                            | eTable 4           |
| Risk of bias in studies       | 18  | Present assessments of risk of bias for each included study.                                                                                                                                                                                                                         | eTable 4           |
| Results of individual studies | 19  | For all outcomes, present, for each study: (a) summary statistics for each group (where appropriate) and (b) an effect estimate and its precision (e.g. confidence/credible interval), ideally using structured tables or plots.                                                     | 8-11<br>Figure 2-5 |
| Results of syntheses          | 20a | For each synthesis, briefly summarise the characteristics and risk of bias among contributing studies.                                                                                                                                                                               | 8-11               |
|                               | 20b | Present results of all statistical syntheses conducted. If meta-analysis was done, present for each the summary estimate and its precision (e.g. confidence/credible interval) and measures of statistical heterogeneity. If comparing groups, describe the direction of the effect. | 8-11               |
|                               | 20c | Present results of all investigations of possible causes of heterogeneity among study results.                                                                                                                                                                                       | 9-11               |
|                               | 20d | Present results of all sensitivity analyses conducted to assess the robustness of the synthesized results.                                                                                                                                                                           | 8-11               |
| Reporting biases              | 21  | Present assessments of risk of bias due to missing results (arising from reporting biases) for each synthesis assessed.                                                                                                                                                              | eFigure 1          |
| Certainty of evidence         | 22  | Present assessments of certainty (or confidence) in the body of evidence for each outcome assessed.                                                                                                                                                                                  | 8-11               |
| <b>DISCUSSION</b>             |     |                                                                                                                                                                                                                                                                                      |                    |
| Discussion                    | 23a | Provide a general interpretation of the results in the context of other evidence.                                                                                                                                                                                                    | 11-13              |
|                               | 23b | Discuss any limitations of the evidence included in the review.                                                                                                                                                                                                                      | 13-14              |
|                               | 23c | Discuss any limitations of the review                                                                                                                                                                                                                                                | 13-14              |

|                                                |     |                                                                                                                                                                                                                                            |     |
|------------------------------------------------|-----|--------------------------------------------------------------------------------------------------------------------------------------------------------------------------------------------------------------------------------------------|-----|
|                                                |     | processes used.                                                                                                                                                                                                                            |     |
|                                                | 23d | Discuss implications of the results for practice, policy, and future research.                                                                                                                                                             | 14  |
| <b>OTHER INFORMATION</b>                       |     |                                                                                                                                                                                                                                            |     |
| Registration and protocol                      | 24a | Provide registration information for the review, including register name and registration number, or state that the review was not registered.                                                                                             | 6   |
|                                                | 24b | Indicate where the review protocol can be accessed, or state that a protocol was not prepared.                                                                                                                                             | 6   |
|                                                | 24c | Describe and explain any amendments to information provided at registration or in the protocol.                                                                                                                                            | N/A |
| Support                                        | 25  | Describe sources of financial or non-financial support for the review, and the role of the funders or sponsors in the review.                                                                                                              | 15  |
| Competing interests                            | 26  | Declare any competing interests of review authors.                                                                                                                                                                                         | 15  |
| Availability of data, code and other materials | 27  | Report which of the following are publicly available and where they can be found: template data collection forms; data extracted from included studies; data used for all analyses; analytic code; any other materials used in the review. | N/A |

*From:* Page MJ, McKenzie JE, Bossuyt PM, Boutron I, Hoffmann TC, Mulrow CD, et al. The PRISMA 2020 statement: an updated guideline for reporting systematic reviews. *BMJ* 2021;372:n71. doi: 10.1136/bmj.n71

For more information, visit: <http://www.prisma-statement.org/>

**eTable 2. MOOSE Checklist**

| <b>REPORTING CRITERIA</b>                                                                                                                                                                                                                                                 | <b>Reported</b> | <b>Page No.</b>    |
|---------------------------------------------------------------------------------------------------------------------------------------------------------------------------------------------------------------------------------------------------------------------------|-----------------|--------------------|
| <b>Reporting of Background</b>                                                                                                                                                                                                                                            |                 |                    |
| Problem definition                                                                                                                                                                                                                                                        | Yes             | 5                  |
| Hypothesis statement                                                                                                                                                                                                                                                      | Yes             | 6                  |
| Description of study outcomes(s)                                                                                                                                                                                                                                          | Yes             | 6                  |
| Type of exposure or intervention used                                                                                                                                                                                                                                     | Yes             | 6                  |
| Type of study design used                                                                                                                                                                                                                                                 | Yes             | 6                  |
| Study population                                                                                                                                                                                                                                                          | Yes             | 6                  |
| <b>Reporting of Search Strategy</b>                                                                                                                                                                                                                                       |                 |                    |
| Qualifications of searchers (librarians & investigators)                                                                                                                                                                                                                  | Yes             | 7                  |
| Search strategy including time period included in synthesis and keywords                                                                                                                                                                                                  | Yes             | 7, eTable 3        |
| Effort to include all available studies including contact with authors                                                                                                                                                                                                    | Yes             | 7                  |
| Database and registries searched                                                                                                                                                                                                                                          | Yes             | 6                  |
| Search software used, name and version, including special features used                                                                                                                                                                                                   | Yes             | N/A                |
| Use of hand searching (e.g. reference list of obtained articles)                                                                                                                                                                                                          | Yes             | eTable 9           |
| List of citations located and those excluded, including justification                                                                                                                                                                                                     | Yes             | Figure 1, eTable 9 |
| Method for addressing articles published in languages other than English                                                                                                                                                                                                  | Yes             | 6                  |
| Method of handling abstracts and unpublished studies                                                                                                                                                                                                                      | Yes             | 6                  |
| Description of any contact with authors                                                                                                                                                                                                                                   | Yes             | 7                  |
| <b>Reporting of Methods</b>                                                                                                                                                                                                                                               |                 |                    |
| Description of relevance or appropriateness of studies assembled for assessing the hypothesis to be tested                                                                                                                                                                | Yes             | eTable 4           |
| Rationale for the selection and coding of data (e.g., sound clinical principles or convenience)                                                                                                                                                                           | Yes             | 6-7                |
| Documentation of how data were classified and coded (e.g., multiple raters, blinding, and interrater reliability)                                                                                                                                                         | Yes             | 6-7                |
| Assessment of confounding (e.g., comparability of cases and controls in studies where appropriate)                                                                                                                                                                        | Yes             | eTable 5           |
| <b>Reporting Criteria</b>                                                                                                                                                                                                                                                 |                 |                    |
| Assessment of study quality, including blinding of quality assessors; stratification or regression of possible predictors of study results                                                                                                                                | Yes             | eTable 4           |
| Assessment of heterogeneity                                                                                                                                                                                                                                               | Yes             | 7-8                |
| Description of statistical methods (e.g., complete description of fixed or random effects models, justification of whether chosen models account for predictors of study results, dose response models or cumulative meta-analysis) in sufficient detail to be replicated | Yes             | 7-8                |
| Provision of appropriate tables or graphs                                                                                                                                                                                                                                 | Yes             | eTable 4, Figure 1 |
| <b>Reporting of Results</b>                                                                                                                                                                                                                                               |                 |                    |
| Table giving descriptive information for each study included                                                                                                                                                                                                              | Yes             | eTable 4           |
| Results of sensitivity testing (e.g., subgroup analysis)                                                                                                                                                                                                                  | Yes             | 8-11               |
| Indication of statistical uncertainty of findings                                                                                                                                                                                                                         | Yes             | 8-11               |
| <b>Reporting of Discussion</b>                                                                                                                                                                                                                                            |                 |                    |
| Quantitative assessment of bias                                                                                                                                                                                                                                           | Yes             | 8-11               |
| Justification of exclusion                                                                                                                                                                                                                                                | Yes             | Figure 1           |
| Assessment of quality of included studies                                                                                                                                                                                                                                 | Yes             | eTable 4           |
| <b>Reporting of Conclusions</b>                                                                                                                                                                                                                                           |                 |                    |
| Consideration of alternative explanations for observed results                                                                                                                                                                                                            | Yes             | 12-14              |
| Generalisation of conclusions                                                                                                                                                                                                                                             | Yes             | 12-14              |
| Guidelines for future research                                                                                                                                                                                                                                            | Yes             | 14                 |
| Disclosure of funding source                                                                                                                                                                                                                                              | Yes             | 15                 |

**eTable 3.** Keywords and Keyword Combinations Used to Screen the PubMed, Scopus, Web of Science, ProQuest, Embase, and Ovid Electronic Databases

("hyperglycemia" OR "insulin" OR "glucose" OR "sugar" OR "diabetes" OR "HbA1c" OR "glycosylated hemoglobin" OR "HOMA-IR" OR "hypertension" OR "blood pressure" OR "dyslipidemia" OR "hyperlipidemia" OR "hypercholesterolemia" OR "hyperlipoproteinemia" OR "Hypertriglyceridemia" OR "cholesterol" OR "triglyceride" OR "LDL" OR "VLDL" OR "HDL" OR "waist circumference" OR "abdominal obesity" OR "central obesity" OR "coronary artery disease" OR "coronary artery diseases" OR "ischemic heart disease" OR "ischemic heart diseases" OR "myocardial ischemia" OR "myocardial infarction" OR "acute coronary syndrome" OR "acute coronary syndromes" OR "cerebrovascular accident" OR "cerebrovascular accidents" OR "stroke" OR "strokes" OR "brain vascular accident" OR "brain vascular accidents" OR "peripheral vascular disease" OR "peripheral vascular diseases" OR "limb ischemia" OR "intermittent claudication" OR "intermittent claudications" OR "non alcoholic fatty liver" OR "non-alcoholic fatty liver" OR "nonalcoholic fatty liver" OR "non alcoholic steatohepatitis" OR "non-alcoholic steatohepatitis" OR "nonalcoholic steatohepatitis" OR "polycystic ovarian syndrome" OR "polycystic ovary syndrome" OR "polycystic ovaries" OR "Stein-Leventhal" OR "Stein Leventhal" OR "Sclerocystic Ovary" OR "Sclerocystic Ovarian")

AND

("pervasive developmental"[Title/Abstract] OR "pervasive child development" [Title/Abstract] OR "autism" [Title/Abstract] OR "asperger syndrome" [Title/Abstract] OR "autistic" [Title/Abstract])

NOT

("maternal"[Title] OR "gestation"[Title] OR "gestational"[Title] OR "pregnant"[Title] OR "pregnancy"[Title] OR "prenatal"[Title] OR "pre-natal"[Title] OR "offspring"[Title] OR "mothers"[Title] OR "children of"[Title] OR "infants of"[Title] OR "babies of"[Title] OR "toddlers of"[Title])

**eTable 4.** Characteristics of the Studies Meeting Eligibility for the Systematic Review and Primary Meta-analyses

| Study (year)                                                                                                      | Database/ source of patients                                                   | Type of study (rating) <sup>a</sup> | Diagnosis of disease | Group (children %), region | Female (%), age (mean [range]), non-Caucasians (%), obesity (%) | Disease / laboratory parameters | Autism | Control | Quality (Good, Fair, or Poor) |
|-------------------------------------------------------------------------------------------------------------------|--------------------------------------------------------------------------------|-------------------------------------|----------------------|----------------------------|-----------------------------------------------------------------|---------------------------------|--------|---------|-------------------------------|
| Studies reporting statistics that could be used to compute the relative risk of cardiometabolic disease in autism |                                                                                |                                     |                      |                            |                                                                 |                                 |        |         |                               |
| Akobirshoev et al. (2020) <sup>1</sup>                                                                            | Healthcare Cost and Utilization Project Nationwide Inpatient Sample, 2004–2014 | Retrospective cohort study (3)      | Registers            | Adults, US                 | 31, [18-55+], 35.3, NA                                          | DM-NS, HT, PVD                  | 462    | 967     | Fair                          |
| Alabaf et al. (2020) <sup>2</sup>                                                                                 | Child and Adolescent Twin Study, 1992–2006                                     | Retrospective cohort study (3)      | Self-report          | Children, Sweden           | 34.2, 9.7 (either 9 or 12 years), NA, NA                        | T1DM                            | 301    | 22028   | Poor                          |
| Brooks et al. (2021) <sup>3</sup>                                                                                 | Electronic Medical Record Primary Care database                                | Retrospective cohort study (3)      | Registers            | Both <sup>b</sup> , Canada | 21.7, 12.6 [1-24], NA, NA                                       | DM-NS                           | 1062   | 79175   | Good                          |
| Chen et al. (2009) <sup>4</sup>                                                                                   | National Health Insurance Research Database, 1997–2004                         | Retrospective cohort study (3)      | Registers            | Children, Taiwan           | 18.4, 3.8 <sup>c</sup> , 100, NA                                | DM-NS                           | 3440   | 34391   | Good                          |
| Chen et al. (2013) <sup>5</sup>                                                                                   | National Health Insurance Research Databases, 1996–2010                        | Retrospective cohort study (3)      | Registers            | Both <sup>b</sup> , Taiwan | 20.3, 17.5 <sup>c</sup> , 100, NA                               | T1DM                            | 1598   | 6392    | Good                          |
| Chen et al. (2016) <sup>6</sup>                                                                                   | National Health Insurance Research Databases, 2002–2009                        | Retrospective cohort study (3)      | Registers            | Both (79.1), Taiwan        | 20, 15.3 <sup>c</sup> , 100, NA                                 | T2DM, HT, DL                    | 6122   | 24488   | Good                          |
| Croen et al. (2015) <sup>7</sup>                                                                                  | Kaiser Permanente in Northern California, 2008–2012                            | Retrospective cohort study (3)      | Registers            | Adults, US                 | 26.9, 29 [18-65+], 34.4, 2.7                                    | DM-NS, HT, DL, stroke           | 1507   | 15070   | Good                          |
| Davignon et al. (2018) <sup>8</sup>                                                                               | Kaiser Permanente in Northern California, 2013–2015                            | Retrospective cohort study (3)      | Registers            | Both (45.7), US            | 19.3, 18.4 [14-25], 46.45, 33.91                                | DM-NS, DL                       | 4123   | 20615   | Good                          |
| Gurney et al. (2006) <sup>9</sup>                                                                                 | National Survey of Children’s Health, 2003-2004                                | Retrospective cohort study (3)      | Parent-report        | Children, US               | 21, 9.3 [3-17], 26.1, 25.2                                      | DM-NS                           | 483    | 84789   | Fair                          |



|                                       |                                                                                                           |                                |           |                        |                                    |                                      |        |           |      |
|---------------------------------------|-----------------------------------------------------------------------------------------------------------|--------------------------------|-----------|------------------------|------------------------------------|--------------------------------------|--------|-----------|------|
| Hand et al. (2020) <sup>10</sup>      | Medicare Standard Analytic Files, 2016-2017                                                               | Retrospective cohort study (3) | Registers | Adults, US             | 32.2, 71.3 [65-84+], 11.1, NA      | DM-NS, HT, DL, stroke, heart disease | 4685   | 46850     | Good |
| Kohane et al. (2012) <sup>11</sup>    | Health Research Informatics Network system, 2001-2010                                                     | Retrospective cohort study (3) | Registers | Both (63.3), US        | 20.7, <35 <sup>c</sup> , NA        | T1DM                                 | 14381  | 2,379,397 | Fair |
| Mouridsen et al. (2016) <sup>12</sup> | Nationwide Danish National Hospital Register, 1960-1984                                                   | Retrospective cohort study (3) | Registers | Adults, Denmark        | 28, 49.6 <sup>c</sup> , NA, NA     | HT, stroke                           | 118    | 336       | Fair |
| Nugent et al. (2022) <sup>13</sup>    | National Ambulatory Medical Care Survey and National Hospital Ambulatory Medical Care Survey, (2002-2018) | Retrospective cohort study (3) | Registers | Children, US           | 19.2, 11.67 [6-18], NA, 4.8        | HT                                   | 119    | 33525     | Good |
| Schott et al. (2021) <sup>14</sup>    | Medicaid Analytic eXtract data, 2008-2012                                                                 | Retrospective cohort study (3) | Registers | Adults, US             | 25.9, 28.5 [18-64], 37.34, NA      | DM-NS, HT, DL, stroke                | 155617 | 466851    | Fair |
| Shedlock et al. (2016) <sup>15</sup>  | Military Health System database, 2000-2013                                                                | Retrospective cohort study (3) | Registers | Children, US           | 20, 8.8 [2-18], NA, 9.86           | T2DM, HT, DL                         | 48762  | 243810    | Good |
| Supekar et al. (2017) <sup>16</sup>   | Stanford Translational Research Integrated Database Environment, 1995-1999                                | Retrospective cohort study (3) | Registers | Both <sup>b</sup> , US | 56, [0-35+], 65, NA                | T1DM                                 | 4790   | 1842575   | Good |
| Tyler et al. (2012) <sup>17</sup>     | Cleveland Clinic electronic records, 2005-2008                                                            | Retrospective cohort study (3) | Registers | Adults, US             | 28.7, 28.8 <sup>c</sup> , 23.1, NA | DM-NS, HT, DL, heart disease         | 108    | 206       | Fair |
| Vohra et al. (2017) <sup>18</sup>     | Medicaid Analytic eXtract, 2000-2008                                                                      | Retrospective cohort study (3) | Registers | Adults, US             | 28.6, 34.1 [22-64], 62.9, NA       | DM-NS                                | 1772   | 5320      | Fair |
| Wallén et al. (2018) <sup>19</sup>    | Central administrative database for                                                                       | Retrospective cohort study (3) | Registers | Both (56.8), Sweden    | 31.6, 72.8 [0-85+], NA, NA         | DM-NS, HT                            | 13921  | 1996140   | Fair |

|                                                                                                                              |                                                                                                                                                                               |                                |             |                        |                                  |                              |      |        |      |
|------------------------------------------------------------------------------------------------------------------------------|-------------------------------------------------------------------------------------------------------------------------------------------------------------------------------|--------------------------------|-------------|------------------------|----------------------------------|------------------------------|------|--------|------|
|                                                                                                                              | Stockholm County, 1998–2015                                                                                                                                                   |                                |             |                        |                                  |                              |      |        |      |
| Weir et al. (2021) <sup>20</sup>                                                                                             | Cambridge Autism Research Database, Autistica Discover Network, autism support groups and charities (including the Autism Research Trust) based online physical health survey | Retrospective cohort study (3) | Self-report | Both <sup>b</sup> , UK | 63.8, 41 [16-70+], 11.68, NA     | DM-NS, HT, DL, heart disease | 1156 | 1212   | Fair |
| Weiss et al. (2018) <sup>21</sup>                                                                                            | Health Care Access Research and Developmental Disabilities, Ontario                                                                                                           | Retrospective cohort study (3) | Registers   | Adults, Canada         | 22.4, 20.4 [18-24], NA, NA       | DM-NS, HT                    | 5095 | 393263 | Good |
| Zerbo et al. (2015) <sup>22</sup>                                                                                            | Kaiser Permanente Northern California, 1980-2003                                                                                                                              | Retrospective cohort study (3) | Registers   | Both <sup>b</sup> , US | 18, 12.2 [12-35], NA, 2.7        | T1DM                         | 5565 | 27825  | Good |
| Studies reporting laboratory parameters of autistic individuals and non-autistic controls allowing between-group comparisons |                                                                                                                                                                               |                                |             |                        |                                  |                              |      |        |      |
| Al-Bazzaz et al. (2020) <sup>23</sup>                                                                                        | Referred by specialized clinicians in Autism Academy of Jordan                                                                                                                | Cross-sectional (4)            | Registers   | Children, Jordan       | 12.9, [4-12], NA, NA             | FBS, Lipid profile           | 35   | 35     | Fair |
| Blazewicz et al. (2020) <sup>24</sup>                                                                                        | Local support groups (mainly parents) or referred by specialized clinicians and therapists                                                                                    | Cross-sectional (4)            | Registers   | Both*, Poland          | 0, 17.3 [15-21], NA, NA          | Lipid profile                | 35   | 37     | Fair |
| Dziobek et al. (2007) <sup>25</sup>                                                                                          | Local Asperger support groups or referred by specialized clinicians.                                                                                                          | Cross-sectional (4)            | Registers   | Adults, US             | 22.7, 40.8 <sup>c</sup> , NA, NA | FBS, Lipid profile           | 22   | 22     | Fair |
| Hassan et al. (2019) <sup>26</sup>                                                                                           | Outpatients' psychiatric clinics of the Neuropsychiatric                                                                                                                      | Cross-sectional (4)            | Registers   | Children, Egypt        | 0, 7.13 <sup>c</sup> , 100, NA   | TC                           | 73   | 73     | Good |

|                                      |                                                                                                                     |                     |           |                        |                                   |                    |    |     |      |
|--------------------------------------|---------------------------------------------------------------------------------------------------------------------|---------------------|-----------|------------------------|-----------------------------------|--------------------|----|-----|------|
|                                      | and Pediatric Departments of South Valley and Assiut University Hospitals, Egypt.                                   |                     |           |                        |                                   |                    |    |     |      |
| Kim et al. (2010) <sup>27</sup>      | Special education school for disabled children located in Seoul                                                     | Cross-sectional (4) | Registers | Children , South Korea | 0, 10.1 [7-12], 100, NA           | Lipid profile      | 29 | 29  | Fair |
| Kwon et al. (2021) <sup>28</sup>     | Specialized Korean schools (Gyeongjin School in Gyeonggi-do, Hyesung School and Haemaru School in Busan), 2017-2018 | Cross-sectional (4) | Registers | Children , South Korea | 30,3, 16.1 <sup>c</sup> , NA, NA  | FBS, Lipid profile | 33 | 271 | Good |
| Manco et al. (2021) <sup>29</sup>    | Child and Adolescence Neuropsychiatric Unit of the Bambino Gesù Hospital, 2017-2018                                 | Cross-sectional (4) | Registers | Children , Italy       | 18, 10 [4-18], NA, NA             | FBS                | 60 | 240 | Good |
| Moses et al. (2014) <sup>30, d</sup> | Medical charts of six hostels operated by Alut, the Israel National Autism Association, 2007-2008                   | Cross-sectional (4) | Registers | Adults, Israel         | 24, 31.1 <sup>c</sup> , NA, NA    | FBS, Lipid profile | 80 | 828 | Good |
| Pearson et al. (2010) <sup>31</sup>  | Oregon Health and Science University/ Child Development and Rehabilitation Center Autism Clinic, 2007-2009          | Cross-sectional (4) | Registers | Children , US          | 16.7, 6.5 <sup>c</sup> , 17.9, NA | TC                 | 42 | 27  | Good |
| Slama et al. (2022) <sup>32</sup>    | Fattouma Bourguiba University Hospital, Monastir, Tunisia and                                                       | Cross-sectional (4) | Registers | Children , Tunisia     | 21.6, 7.3 [3-16], NA, NA          | FBS, Lipid profile | 51 | 40  | Good |

|                                        |                                                                          |                         |           |                           |                              |                       |     |      |      |
|----------------------------------------|--------------------------------------------------------------------------|-------------------------|-----------|---------------------------|------------------------------|-----------------------|-----|------|------|
|                                        | Farhat Hached<br>University Hospital,<br>Sousse, 2018-2019               |                         |           |                           |                              |                       |     |      |      |
| Tierney et al.<br>(2021) <sup>33</sup> | Autism Genetics<br>Research Exchange<br>(AGRE)                           | Cross-<br>sectional (4) | Registers | Both <sup>b</sup> ,<br>US | 17.4, [4-19], NA,<br>NA      | TC, HDL               | 501 | 6445 | Fair |
| Zurita et al.<br>(2020) <sup>34</sup>  | Those who attended<br>school in the<br>Metropolitan District<br>of Quito | Cross-<br>sectional (4) | Registers | Children<br>,<br>Ecuador  | 22.7, 8.9 [5-12],<br>100, NA | FBS, Lipid<br>profile | 25  | 34   | Fair |

<sup>a</sup> Rating scheme used has been modified from the Oxford Centre for Evidence-based Medicine for ratings of individual studies

<sup>b</sup> Cannot calculate percentage of children as children and adult distributions were not explained clearly

<sup>c</sup> Age ranges were not reported

<sup>d</sup> Study was deemed eligible after the initial abstract and subsequent full-text screening. However, the statistics reported in the study were not included in the meta-analyses due to selective exclusion of participants who had been treated with medications for cardiometabolic disease from the study

DM-NS-Diabetes mellitus (not-specified); T1DM-Type 1 diabetes mellitus; T2DM-Type 2 diabetes mellitus; HT-hypertension; DL-dyslipidemia; PVD-peripheral vascular disease; FBS-fasting blood sugar; TC-total cholesterol

**eTable 5.** Demographic Summaries of Individual Meta-analyzed Samples

| Meta-analysis         | Autism | Control | Female %; male: female ratio | Mean age [range]; % Children; Age Distribution                | non-Caucasians % | Geographical Region                           |
|-----------------------|--------|---------|------------------------------|---------------------------------------------------------------|------------------|-----------------------------------------------|
| Diabetes mellitus     | 274950 | 7691364 | 24.5; 3:1                    | 22.0 [3.8-72.83]; Children 28.0; Adults-9, Children-4, Both-7 | 28.0             | US-12, Taiwan-3, Canada-3, Sweden-2           |
| Hypertension          | 237672 | 3222718 | 24.3; 3:1                    | 24.4 [8.8-72.8]; 25.9; Adults-7, Children-1; Both-4           | 27.6             | US-7; Canada-2; Sweden-1; Taiwan-1; Denmark-1 |
| Dyslipidemia          | 217395 | 772252  | 24.5; 3:1                    | 23.6 [8.8-40.98]; 25.8; Adults-3, Children-1, Both-3          | 30.7             | US-5, Canada-1, Taiwan-1                      |
| Macrovascular disease | 163653 | 531492  | 26.3; 2.8:1                  | 29.7 [28.48-71.3]; NA; Adult-6, Both - 1                      | 35.6             | US-5, Canada-1, Denmark-1                     |

**eTable 6.** Results of the Random-Effects Meta-regression Analyses That Examined the Heterogeneity and Moderator Effects of the Association Between Autism and Relative Risk of Diabetes

| Model | Dependent Variable                 | k                                                                                                                                                    | Moderator           | $\beta$ | SE     | 95%CI           | p-value |
|-------|------------------------------------|------------------------------------------------------------------------------------------------------------------------------------------------------|---------------------|---------|--------|-----------------|---------|
| 1     | Relative risk of diabetes mellitus | 14                                                                                                                                                   | Intercept           | -0.289  | 0.325  | -0.926, 0.348   | 0.374   |
|       |                                    |                                                                                                                                                      | Non-Caucasian (%)   | 1.319   | 0.581  | 0.181, 2.456    | 0.023   |
|       |                                    | Residual heterogeneity: $I^2 = 98.29\%$ ; $\tau^2 = 0.3843$ ; $QE = 445.367$ ; $p < 0.001$<br>Moderator effect: $QM (df = 1) = 5.161$ ; $p = 0.0231$ |                     |         |        |                 |         |
| 2     | Relative risk of diabetes mellitus | 14                                                                                                                                                   | Intercept           | 0.7807  | 0.234  | 0.323, 1.239    | 0.001   |
|       |                                    |                                                                                                                                                      | Age (years)         | -0.010  | 0.007  | -0.023, 0.003   | 0.119   |
|       |                                    | Residual heterogeneity: $I^2 = 97.65\%$ ; $\tau^2 = 0.298$ ; $QE = 971.636$ ; $p < 0.001$<br>Moderator effect: $QM (df = 1) = 2.427$ ; $p = 0.119$   |                     |         |        |                 |         |
| 3     | Relative risk of diabetes mellitus | 25                                                                                                                                                   | Intercept           | 0.740   | 0.261  | 0.229, 1.251    | 0.005   |
|       |                                    |                                                                                                                                                      | Female (%)          | -1.013  | 0.811  | -2.602, 0.576   | 0.212   |
|       |                                    | Residual heterogeneity: $I^2 = 98.62\%$ ; $\tau^2 = 0.318$ ; $QE = 1144.750$ ; $p < 0.001$<br>Moderator effect: $QM (df = 1) = 1.560$ ; $p = 0.212$  |                     |         |        |                 |         |
| 4     | Relative risk of diabetes mellitus | 11                                                                                                                                                   | Intercept           | 0.813   | 0.288  | 0.249, 1.378    | 0.005   |
|       |                                    |                                                                                                                                                      | Obesity (%)         | -2.984  | 1.800  | -6.511, 0.544   | 0.097   |
|       |                                    | Residual heterogeneity: $I^2 = 99.05\%$ ; $\tau^2 = 0.247$ ; $QE = 798.399$ ; $p < 0.001$<br>Moderator effect: $QM (df = 1) = 2.749$ ; $p = 0.097$   |                     |         |        |                 |         |
| 5     | Relative risk of diabetes mellitus | 25                                                                                                                                                   | Intercept (Other)   | 0.754   | 0.1676 | 0.425, 1.082    | < 0.001 |
|       |                                    |                                                                                                                                                      | Region (US)         | -0.558  | 0.2286 | -1.006, -0.110  | 0.015   |
|       |                                    | Residual heterogeneity: $I^2 = 98.48\%$ ; $\tau^2 = 0.267$ ; $QE = 857.217$ ; $p < 0.001$<br>Moderator effect: $QM (df = 1) = 5.952$ ; $p = 0.015$   |                     |         |        |                 |         |
| 6     | Relative risk of diabetes mellitus | 25                                                                                                                                                   | Intercept           | 163.081 | 63.599 | 38.428, 287.733 | 0.010   |
|       |                                    |                                                                                                                                                      | Year of publication | -0.081  | 0.032  | -0.142, -0.019  | 0.011   |
|       |                                    | Residual heterogeneity: $I^2 = 98.02\%$ ; $\tau^2 = 0.242$ ; $QE = 332.858$ ; $p < 0.001$<br>Moderator effect: $QM (df = 1) = 6.539$ ; $p = 0.011$   |                     |         |        |                 |         |
| 7     | Relative risk of diabetes mellitus | 25                                                                                                                                                   | Intercept (Adult)   | 0.289   | 0.156  | -0.017, 0.594   | 0.064   |
|       |                                    |                                                                                                                                                      | Both                | 0.008   | 0.256  | -0.494, 0.510   | 0.976   |
|       |                                    |                                                                                                                                                      | Children            | 0.754   | 0.282  | 0.202, 1.307    | 0.008   |
|       |                                    | Residual heterogeneity: $I^2 = 98.35\%$ ; $\tau^2 = 0.243$ ; $QE = 634.261$ ; $p < 0.001$<br>Moderator effect: $QM (df = 2) = 8.011$ ; $p = 0.018$   |                     |         |        |                 |         |

**eTable 7.** Summary of Assessments for Publication Bias and Adjusted Outcomes

| DV  | Funnel Asymmetry | Number of Imputes | Random-effects model      | p-value |
|-----|------------------|-------------------|---------------------------|---------|
| FBS | Symmetrical      | 0                 | 1.891 [-2.047, 5.829]     | 0.347   |
| TC  | Asymmetrical     | 7                 | -23.773 [-37.774; -9.773] | 0.001   |
| HDL | Symmetrical      | 0                 | -9.353 [-13.422; -5.284]] | < 0.001 |
| LDL | Asymmetrical     | 3                 | 34.734 [7.659; 61.808]    | 0.012   |
| TG  | Asymmetrical     | 3                 | 9.873 [-10.532; 30.277]   | 0.343   |

**eTable 8.** Results of the Random-Effects Meta-regression Analyses That Examined the Heterogeneity and Moderator Effects of the Association Between Autism and Relative Risk of Hypertension

| Model | Dependent Variable            | k                                                                                                                                                    | Moderator           | $\beta$ | SE     | 95%CI             | p-value |
|-------|-------------------------------|------------------------------------------------------------------------------------------------------------------------------------------------------|---------------------|---------|--------|-------------------|---------|
| 1     | Relative risk of hypertension | 7                                                                                                                                                    | Intercept           | 0.119   | 0.179  | -0.233, 0.470     | 0.508   |
|       |                               |                                                                                                                                                      | Non-Caucasian (%)   | -0.138  | 0.401  | -0.925, 0.649     | 0.731   |
|       |                               | Residual heterogeneity: $I^2 = 96.42\%$ ; $\tau^2 = 0.071$ ; $QE = 219.817$ ; $p < 0.001$<br>Moderator effect: $QM (df = 1) = 0.118$ ; $p = 0.732$   |                     |         |        |                   |         |
| 2     | Relative risk of hypertension | 13                                                                                                                                                   | Intercept           | 0.603   | 0.190  | 0.231, 0.975      | 0.001   |
|       |                               |                                                                                                                                                      | Age (years)         | -0.011  | 0.005  | -0.020, -0.017    | 0.021   |
|       |                               | Residual heterogeneity: $I^2 = 97.39\%$ ; $\tau^2 = 0.120$ ; $QE = 759.915$ ; $p < 0.001$<br>Moderator effect: $QM (df = 1) = 5.336$ ; $p = 0.021$   |                     |         |        |                   |         |
| 3     | Relative risk of hypertension | 14                                                                                                                                                   | Intercept           | 0.522   | 0.231  | 0.068, 0.975      | 0.024   |
|       |                               |                                                                                                                                                      | Female (%)          | -1.171  | 0.745  | -2.630, 0.288     | 0.116   |
|       |                               | Residual heterogeneity: $I^2 = 99.10\%$ ; $\tau^2 = 0.149$ ; $QE = 1126.7445$ ; $p < 0.001$<br>Moderator effect: $QM (df = 1) = 2.474$ ; $p = 0.115$ |                     |         |        |                   |         |
| 4     | Relative risk of hypertension | 10                                                                                                                                                   | Intercept           | 0.156   | 0.241  | -0.316, 0.628     | 0.516   |
|       |                               |                                                                                                                                                      | Obesity (%)         | 0.544   | 1.661  | -2.711, 3.799     | 0.743   |
|       |                               | Residual heterogeneity: $I^2 = 99.49\%$ ; $\tau^2 = 0.192$ ; $QE = 758.417$ ; $p < 0.001$<br>Moderator effect: $QM (df = 1) = 0.107$ ; $p = 0.743$   |                     |         |        |                   |         |
| 5     | Relative risk of hypertension | 14                                                                                                                                                   | Intercept (Other)   | 0.209   | 0.163  | -0.111, 0.528     | 0.200   |
|       |                               |                                                                                                                                                      | Region (US)         | -0.024  | 0.233  | -0.480, 0.432     | 0.919   |
|       |                               | Residual heterogeneity: $I^2 = 99.46\%$ ; $\tau^2 = 0.179$ ; $QE = 1396.59$ ; $p < 0.001$<br>Moderator effect: $QM (df = 1) = 0.010$ ; $p = 0.919$   |                     |         |        |                   |         |
| 6     | Relative risk of hypertension | 14                                                                                                                                                   | Intercept           | 73.661  | 90.433 | -103.585, 250.907 | 0.415   |
|       |                               |                                                                                                                                                      | Year of publication | -0.036  | 0.045  | -0.124, 0.051     | 0.417   |
|       |                               | Residual heterogeneity: $I^2 = 99.24\%$ ; $\tau^2 = 0.163$ ; $QE = 630.505$ ; $p < 0.001$<br>Moderator effect: $QM (df = 1) = 0.660$ ; $p = 0.417$   |                     |         |        |                   |         |
| 7     | Relative risk of hypertension | 14                                                                                                                                                   | Intercept (Adult)   | 0.100   | 0.104  | -0.104, 0.305     | 0.336   |
|       |                               |                                                                                                                                                      | Both                | -0.076  | 0.221  | -0.508, 0.356     | 0.730   |
|       |                               |                                                                                                                                                      | Children            | 0.826   | 0.249  | 0.339, 1.314      | 0.001   |
|       |                               | Residual heterogeneity: $I^2 = 99.01\%$ ; $\tau^2 = 0.089$ ; $QE = 1186.393$ ; $p < 0.001$<br>Moderator effect: $QM (df = 2) = 12.098$ ; $p = 0.002$ |                     |         |        |                   |         |



**eTable 9.** List of Excluded Studies

| Reference                                                                                                                                                                                                                                                                                         | Cause                                      |
|---------------------------------------------------------------------------------------------------------------------------------------------------------------------------------------------------------------------------------------------------------------------------------------------------|--------------------------------------------|
| An J, DuBose KD, Decker JT, Hatala LE. A school-based mentoring program developing healthy behaviors of adolescents with intellectual and developmental disabilities: A pilot feasibility study. <i>Disability and Health Journal</i> . 2019;12(4):727-731.                                       | No comparable control group                |
| Brondino N, Fusar-Poli L, Miceli E, et al. Prevalence of medical comorbidities in adults with autism spectrum disorder. <i>Journal of general internal medicine</i> . 2019;34(10):1992-1994.                                                                                                      | No comparable control group                |
| Dumbuya A, Comnick C, Xie XJ, Marchini L. Types of dental procedures provided to adults with autism spectrum condition: A descriptive study. <i>Special Care in Dentistry</i> . 2021;41(5):553-558.                                                                                               | No comparable control group                |
| Fortuna RJ, Robinson L, Smith TH, et al. Health conditions and functional status in adults with autism: A cross-sectional evaluation. <i>Journal of General Internal Medicine</i> . 2016;31(1):77-84.                                                                                             | No comparable control group                |
| Gilmore D, Harris L, Longo A, Hand BN. Health status of Medicare-enrolled autistic older adults with and without co-occurring intellectual disability: An analysis of inpatient and institutional outpatient medical claims. <i>Autism</i> . 2021;25(1):266-274.                                  | No comparable control group                |
| Guinchat V, Cravero C, Diaz L, et al. Acute behavioral crises in psychiatric inpatients with autism spectrum disorder (ASD): recognition of concomitant medical or non-ASD psychiatric conditions predicts enhanced improvement. <i>Research in developmental disabilities</i> . 2015;38:242-255. | No comparable control group                |
| Houghton R, De Vries F, Loss G. Psychostimulants/atomoxetine and serious cardiovascular events in children with ADHD or autism spectrum disorder. <i>CNS drugs</i> . 2020;34(1):93-101.                                                                                                           | No comparable control group                |
| Jain S, Andridge R, Hellings JA. Loxapine for reversal of antipsychotic-induced metabolic disturbances: a chart review. <i>Journal of autism and developmental disorders</i> . 2016;46(4):1344-1353.                                                                                              | No comparable control group                |
| Jones KB, Cottle K, Bakian A, et al. A description of medical conditions in adults with autism spectrum disorder: A follow-up of the 1980s Utah/UCLA Autism Epidemiologic Study. <i>Autism</i> . 2016;20(5):551-561.                                                                              | No comparable control group                |
| Kohane IS, McMurry A, Weber G, et al. The co-morbidity burden of children and young adults with autism spectrum disorders. <i>PLoS one</i> . 2012;7(4):e33224.                                                                                                                                    | No comparable control group                |
| Luo Y, Eran A, Palmer N, et al. A multidimensional precision medicine approach identifies an autism subtype characterized by dyslipidemia. <i>Nature Medicine</i> . 2020;26(9):1375-1379.                                                                                                         | No comparable control group                |
| Ptomey L, Walpitage D, Mohseni M, et al. Weight status and associated comorbidities in children and adults with Down syndrome, autism spectrum disorder and intellectual and developmental disabilities. <i>Journal of Intellectual Disability Research</i> . 2020;64(9):725-737.                 | No comparable control group                |
| Saqr Y, Braun E, Porter K, Barnette D, Hanks C. Addressing medical needs of adolescents and adults with autism spectrum disorders in a primary care setting. <i>Autism</i> . 2018;22(1):51-61.                                                                                                    | No comparable control group                |
| Scahill L, Jeon S, Boorin SJ, et al. Weight gain and metabolic consequences of risperidone in young children with autism spectrum disorder. <i>Journal of the American Academy of Child &amp; Adolescent Psychiatry</i> . 2016;55(5):415-423.                                                     | No comparable control group                |
| Wise EA, Smith MD, Rabins PV. Aging and autism spectrum disorder: A naturalistic, longitudinal study of the comorbidities and behavioral and neuropsychiatric symptoms in adults with ASD. <i>Journal of Autism and Developmental Disorders</i> . 2017;47(6):1708-1715.                           | No comparable control group                |
| Ames JL, Massolo ML, Davignon MN, Qian Y, Croen LA. Healthcare service utilization and cost among transition-age youth with autism spectrum disorder and other special healthcare needs. <i>Autism</i> . 2021;25(3):705-718.                                                                      | Prevalence of any considered outcomes in a |

|                                                                                                                                                                                                                                                                                                                           |                                                                                                                      |
|---------------------------------------------------------------------------------------------------------------------------------------------------------------------------------------------------------------------------------------------------------------------------------------------------------------------------|----------------------------------------------------------------------------------------------------------------------|
|                                                                                                                                                                                                                                                                                                                           | sample of individuals with autism spectrum disorders not reported                                                    |
| Esteban-Figuerola P, Morales-Hidalgo P, Arijia-Val V, Canals-Sans J. Are there anthropometric and body composition differences between children with autism spectrum disorder and children with typical development? Analysis by age and spectrum severity in a school population. <i>Autism</i> . 2021;1362361320987724. | Prevalence of any considered outcomes in a sample of individuals with autism spectrum disorders not reported         |
| Luçardo JdC, Monk GF, Dias MdS, et al. Interest in food and triglyceride concentrations in children and adolescents with autistic spectrum disorder. <i>Jornal de pediatria</i> . 2021;97:103-108.                                                                                                                        | Prevalence of any considered outcomes in a sample of individuals with autism spectrum disorders not reported         |
| Usui N, Iwata K, Miyachi T, et al. VLDL-specific increases of fatty acids in autism spectrum disorder correlate with social interaction. <i>EBioMedicine</i> . 2020;58:102917.                                                                                                                                            | Prevalence of any considered outcomes in a sample of individuals with autism spectrum disorders not reported         |
| Kolachahi SA, AdibSaber F, Zidashti ZH, Elmieh A, Bidabadi E, Hosseinkhazadeh AA. Water-based training in combined with vitamin D supplementation improves lipid profile in children with ASD. <i>Research in Autism Spectrum Disorders</i> . 2020;76:101603.                                                             | Prevalence of any considered outcomes in a sample of individuals with autism spectrum disorders not reported         |
| Hirai T, Usui N, Iwata K, et al. Increased plasma lipoprotein lipase activity in males with autism spectrum disorder. <i>Research in autism spectrum disorders</i> . 2020;77:101630. doi:10.1016/j.rasd.2020.101630                                                                                                       | Prevalence of any considered outcomes in a sample of individuals with autism spectrum disorders not reported         |
| Benachenhou S, Etcheverry A, Galarneau L, Dubé J, Çaku A. Implication of hypocholesterolemia in autism spectrum disorder and its associated comorbidities: A retrospective case-control study. <i>Autism Res</i> . Dec 2019;12(12):1860-1869. doi:10.1002/aur.2183                                                        | Prevalence of any considered outcomes in a sample of individuals with autism spectrum disorders cannot be calculated |
| Stanek KR, Youngkin EM, Pyle LL, Raymond JK, Driscoll KA, Majidi S. Prevalence, characteristics, and diabetes management in children with comorbid                                                                                                                                                                        | Prevalence of type 1 diabetes in a                                                                                   |

|                                                                                                                                                                                                                                                                                                                                                        |                                                                                                                      |
|--------------------------------------------------------------------------------------------------------------------------------------------------------------------------------------------------------------------------------------------------------------------------------------------------------------------------------------------------------|----------------------------------------------------------------------------------------------------------------------|
| autism spectrum disorder and type 1 diabetes. <i>Pediatric diabetes</i> . 2019;20(5):645-651.                                                                                                                                                                                                                                                          | sample of individuals with autism spectrum disorders not reported                                                    |
| Román PÁL, Salvador MS, Sánchez JS, Pinillos FG. Low level of physical fitness is an early feature in preschool children with autism. <i>Retos: nuevas tendencias en educación física, deporte y recreación</i> . 2019;(35):348-350.                                                                                                                   | Prevalence of any considered outcomes in a sample of individuals with autism spectrum disorders not reported         |
| Tolchard B, Stuhlmiller C. Chronic health and lifestyle problems for people diagnosed with autism in a student-led clinic. <i>Advances in Autism</i> . 2018;                                                                                                                                                                                           | Prevalence of any considered outcomes in a sample of individuals with autism spectrum disorders cannot be calculated |
| Castro K, Faccioli LS, Baronio D, Gottfried C, Perry IS, Riesgo R. Body composition of patients with autism spectrum disorder through bioelectrical impedance. <i>Nutricion hospitalaria</i> . 2017;34(4):875-879.                                                                                                                                     | Prevalence of any considered outcomes in a sample of individuals with autism spectrum disorders not reported         |
| McDermott S, Moran R, Platt T, Issac T, Wood H, Dasari S. Depression in adults with disabilities, in primary care. <i>Disability and rehabilitation</i> . 2005;27(3):117-123.                                                                                                                                                                          | Prevalence of any considered outcomes in a sample of individuals with autism spectrum disorders not reported         |
| Schott W, Tao S, Shea L. COVID-19 risk: Adult Medicaid beneficiaries with autism, intellectual disability, and mental health conditions. <i>Autism</i> . 2022;26(4):975-87.                                                                                                                                                                            | Overlap with another included study <sup>14</sup>                                                                    |
| Chen MH, Tsai SJ, Bai YM, Huang KL, Su TP, Chen TJ, Hsu JW. Type 1 diabetes mellitus and risks of major psychiatric disorders: A nationwide population-based cohort study. <i>Diabetes &amp; Metabolism</i> . 2022;48(1):101319.                                                                                                                       | Prevalence of type 1 diabetes in a sample of individuals with autism spectrum disorders not reported                 |
| Liu S, Kuja-Halkola R, Larsson H, Lichtenstein P, Ludvigsson JF, Svensson AM, Gudbjörnsdóttir S, Tideman M, Serlachius E, Butwická A. Neurodevelopmental Disorders, Glycemic Control, and Diabetic Complications in Type 1 Diabetes: a Nationwide Cohort Study. <i>The Journal of Clinical Endocrinology &amp; Metabolism</i> . 2021;106(11):e4459-70. | Prevalence of type 1 diabetes in a sample of individuals with autism spectrum disorders not reported                 |

|                                                                                                                                                                                                                                                                                                         |                                                                                                                     |
|---------------------------------------------------------------------------------------------------------------------------------------------------------------------------------------------------------------------------------------------------------------------------------------------------------|---------------------------------------------------------------------------------------------------------------------|
| <p>Kennedy N, Kennedy J, Kerr M, Dredge S, Brophy S. Health checks for adults with intellectual disability and association with survival rates: a linked electronic records matched cohort study in Wales, UK. <i>BMJ open</i>. 2022;12(4):e049441.</p>                                                 | <p>Prevalence of any considered outcomes in a sample of individuals with autism spectrum disorders not reported</p> |
| <p>Cooper SA, Henderson A, Kinnear D, Mackay D, Fleming M, Smith GS, Hughes-McCormack LA, Rydzewska E, Dunn K, Pell JP, Melville C. Cohort profile: Scotland's record-linkage e-cohorts of people with intellectual disabilities, and autistic people (SCIDA). <i>BMJ open</i>. 2022;12(5):e057230.</p> | <p>Prevalence of any considered outcomes in a sample of individuals with autism spectrum disorders not reported</p> |
| <p>Thom RP, Palumbo ML, Keary CJ, Hooker JM, McDougle CJ, Ravichandran CT. Prevalence and factors associated with overweight, obesity, and hypertension in a large clinical sample of adults with autism spectrum disorder. <i>Scientific Reports</i>. 2022;12(1):1-1.</p>                              | <p>No comparable control group</p>                                                                                  |
| <p>McLeod, J. D., Hawbaker, A., &amp; Meanwell, E. (2021). The health of college students on the autism spectrum as compared to their neurotypical peers. <i>Autism</i>, 25(3), 719-730.</p>                                                                                                            | <p>Prevalence of any considered outcomes in a sample of individuals with autism spectrum disorders not reported</p> |
| <p>Simantov T, Pohl A, Tsompanidis A, Weir E, Lombardo MV, Ruigrok A, Smith P, Allison C, Baron-Cohen S, Uzefovsky F. Medical symptoms and conditions in autistic women. <i>Autism</i>. 2022;26(2):373-88.</p>                                                                                          | <p>Prevalence of any considered outcomes in a sample of individuals with autism spectrum disorders not reported</p> |

**eFigure 1.** Funnel Plot Depicting Publication Bias and Imputed Effect Sizes to Correct for Publication Bias for Cardiometabolic Risk Factors

**A. Diabetes mellitus, B. Hypertension, C. Dyslipidemia, D. Macrovascular complications**

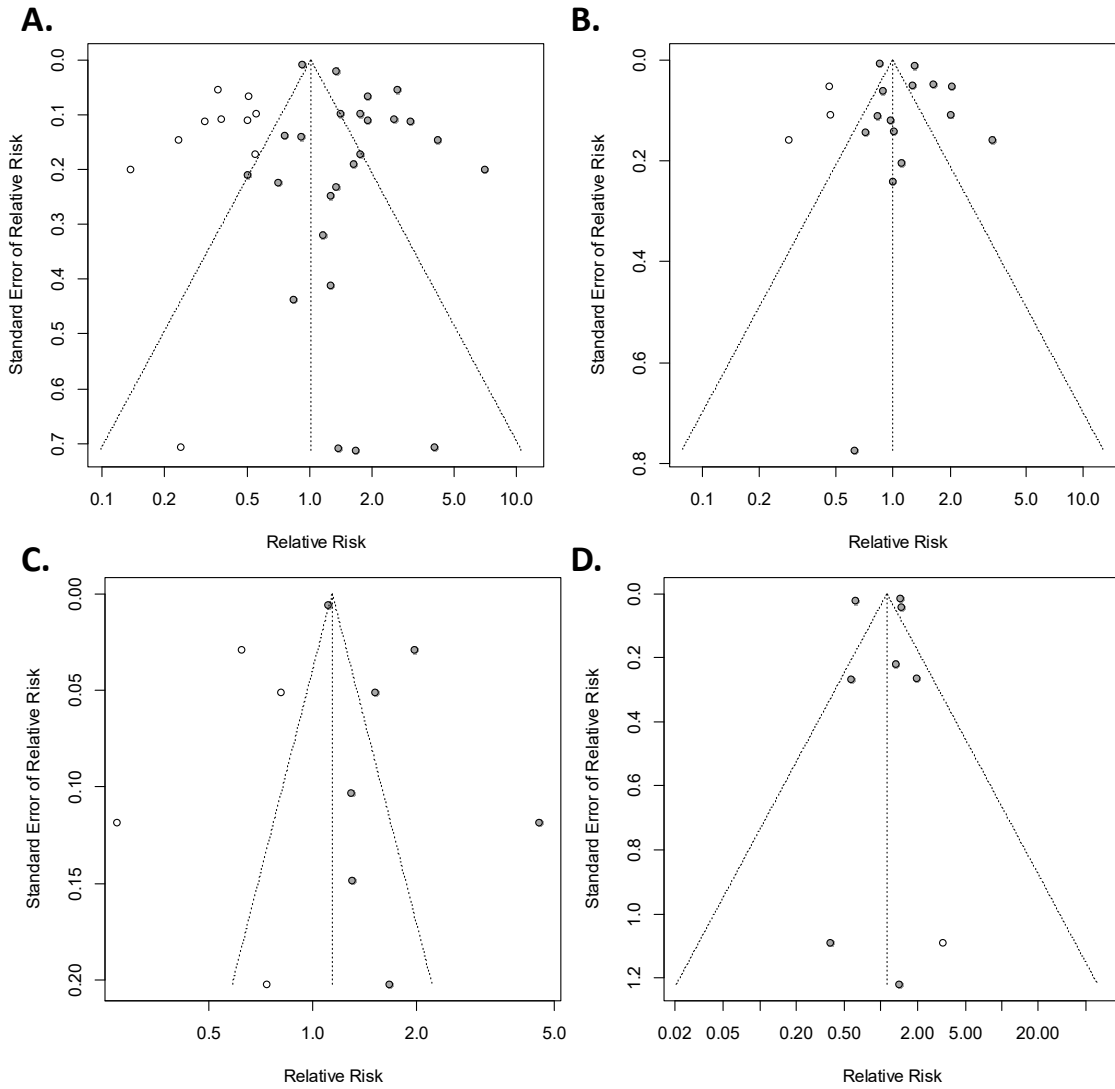

**eFigure 2.** Results of Random-Effects Meta-analysis Examining the Relative Risk of Diabetes With Subgroup Analysis for Age Groups

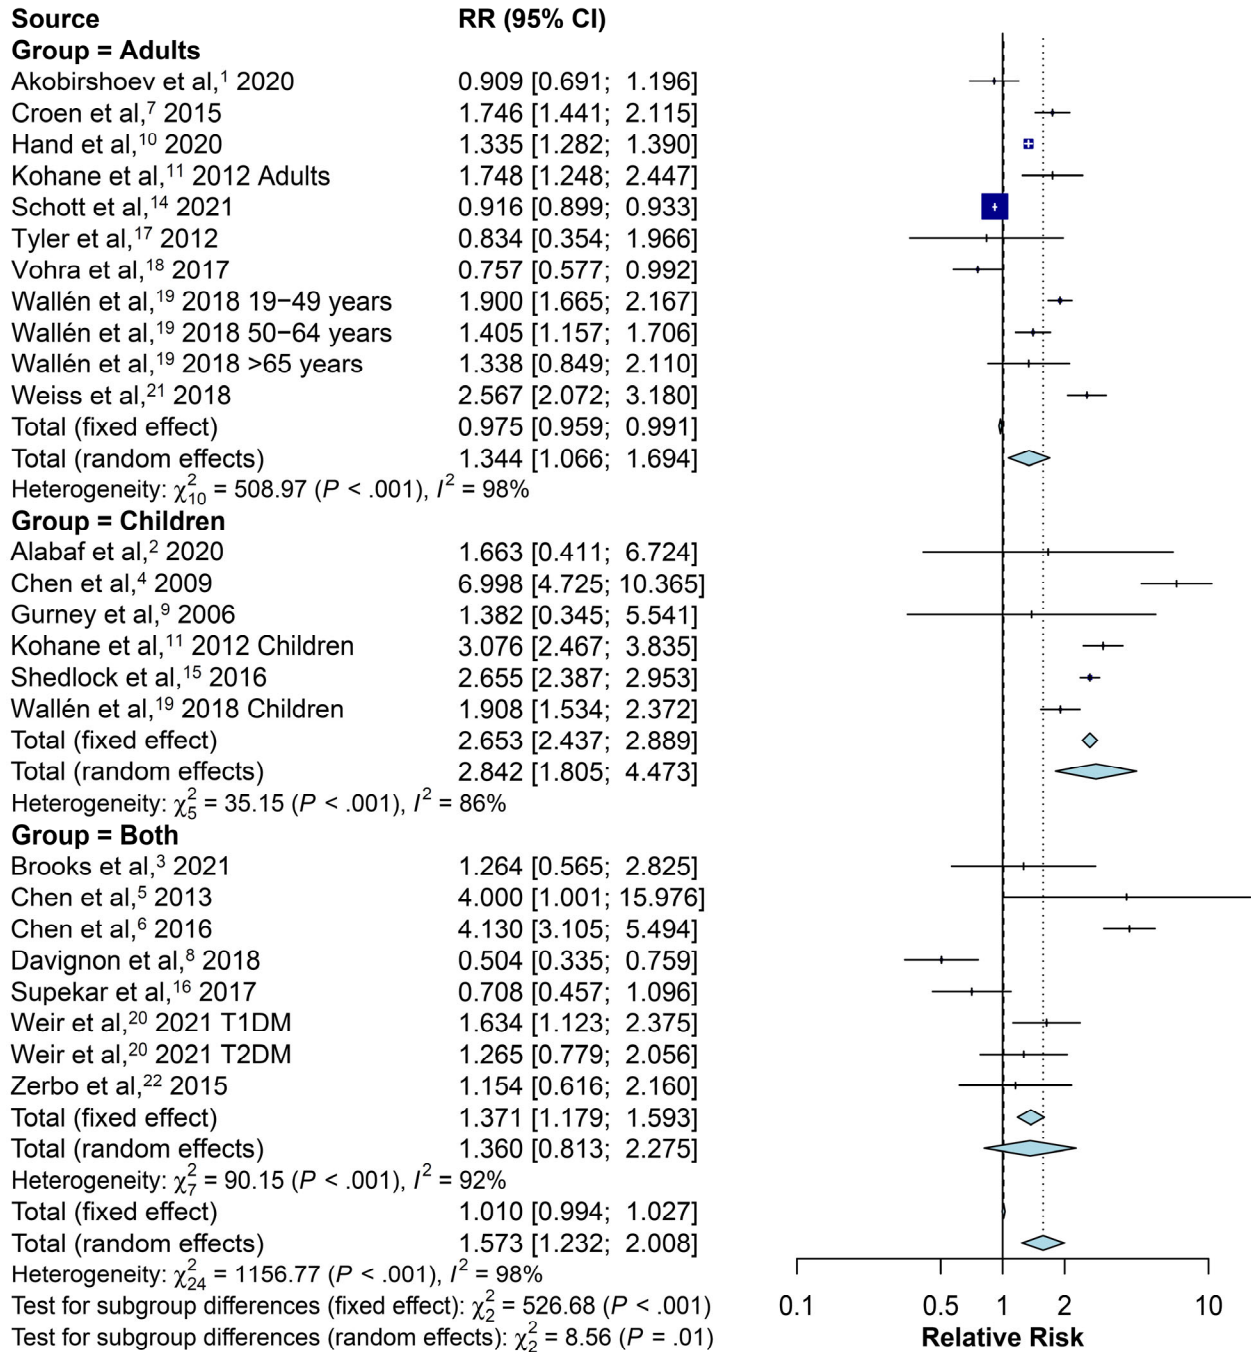

**eFigure 3.** Results of Random-Effects Meta-analysis Examining the Mean Difference of Fasting Blood Glucose Levels Between Autistic and Nonautistic Individuals

| Source                                                         | MD (95% CI)           |
|----------------------------------------------------------------|-----------------------|
| Al-Bazzaz et al, <sup>23</sup> 2020                            | -6.77 [-11.13; -2.41] |
| Dziobek et al, <sup>25</sup> 2007                              | 0.00 [-5.38; 5.38]    |
| Kwon et al, <sup>28</sup> 2021                                 | 4.08 [-2.51; 10.67]   |
| Manco et al, <sup>29</sup> 2021                                | 4.50 [ 2.24; 6.76]    |
| Slama et al, <sup>32</sup> 2022                                | 4.68 [ 1.11; 8.25]    |
| Zurita et al, <sup>34</sup> 2020                               | 5.60 [-2.09; 13.29]   |
| Total (fixed effect)                                           | 2.69 [ 1.11; 4.27]    |
| Total (random effects)                                         | 1.89 [-2.05; 5.83]    |
| Heterogeneity: $\chi^2_5 = 23.44$ ( $P < .001$ ), $I^2 = 79\%$ |                       |

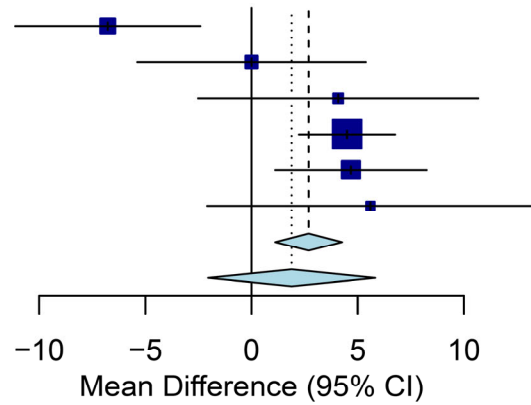

**eFigure 4.** Results of Random-Effects Meta-analysis Examining the Relative Risk Hypertension With Subgroup Analysis for Age Groups

| Source                                                                            | RR (95% CI)          |
|-----------------------------------------------------------------------------------|----------------------|
| <b>Group = Adults</b>                                                             |                      |
| Akobirshoev et al, <sup>1</sup> 2020                                              | 0.830 [0.668; 1.032] |
| Croen et al, <sup>7</sup> 2015                                                    | 1.638 [1.492; 1.799] |
| Hand et al, <sup>10</sup> 2020                                                    | 1.299 [1.271; 1.328] |
| Mouridsen et al, <sup>12</sup> 2016                                               | 0.633 [0.139; 2.887] |
| Schott et al, <sup>14</sup> 2021                                                  | 0.857 [0.846; 0.869] |
| Tyler et al, <sup>17</sup> 2012                                                   | 1.001 [0.623; 1.609] |
| Wallén et al, <sup>19</sup> 2018 19–49 years                                      | 1.260 [1.141; 1.391] |
| Wallén et al, <sup>19</sup> 2018 50–64 years                                      | 0.886 [0.784; 1.001] |
| Wallén et al, <sup>19</sup> 2018 >65 years                                        | 0.719 [0.541; 0.954] |
| Weiss et al, <sup>21</sup> 2018                                                   | 2.010 [1.624; 2.489] |
| <b>Group = Both</b>                                                               |                      |
| Chen et al, <sup>6</sup> 2016                                                     | 1.012 [0.766; 1.339] |
| Nugent et al, <sup>13</sup> 2022                                                  | 1.106 [0.741; 1.650] |
| Weir et al, <sup>20</sup> 2021                                                    | 0.976 [0.772; 1.233] |
| <b>Group = Children</b>                                                           |                      |
| Shedlock et al, <sup>15</sup> 2016                                                | 2.025 [1.826; 2.247] |
| Wallén et al, <sup>19</sup> 2018 Children                                         | 3.325 [2.437; 4.537] |
| Total (fixed effect)                                                              | 0.927 [0.916; 0.938] |
| Total (random effects)                                                            | 1.219 [0.979; 1.518] |
| Heterogeneity: $\chi^2_{14} = 1425.72$ ( $P < .001$ ), $I^2 = 99\%$               |                      |
| Test for subgroup differences (fixed effect): $\chi^2_2 = 269.41$ ( $P < .001$ )  |                      |
| Test for subgroup differences (random effects): $\chi^2_2 = 12.52$ ( $P = .002$ ) |                      |

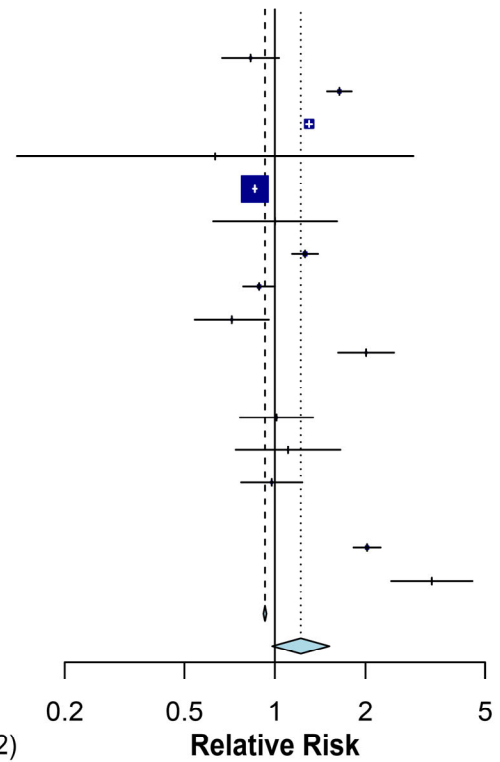



**eFigure 5.** Results of Random-Effects Meta-analysis Examining the Mean Difference of High-Density Cholesterol Levels Between Autistic and Nonautistic Individuals

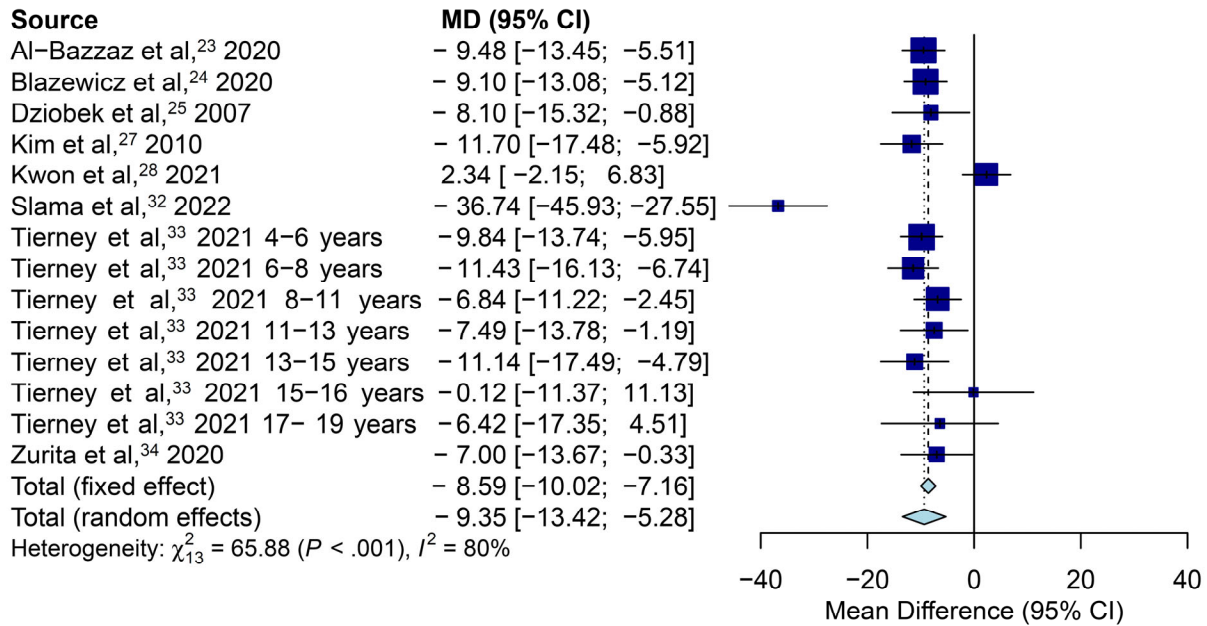

**eFigure 6.** Results of Random-Effects Meta-analysis Examining the Mean Difference of Low-Density Cholesterol Levels Between Autistic and Nonautistic Individuals

| Source                                                          | MD (95% CI)            |
|-----------------------------------------------------------------|------------------------|
| Al-Bazzaz et al, <sup>23</sup> 2020                             | -10.94 [-19.38; -2.50] |
| Dziobek et al, <sup>25</sup> 2007                               | 22.40 [ 7.34; 37.46]   |
| Kim et al, <sup>27</sup> 2010                                   | -3.70 [-18.02; 10.62]  |
| Slama et al, <sup>32</sup> 2022                                 | 37.90 [ 32.66; 43.13]  |
| Zurita et al, <sup>34</sup> 2020                                | -1.60 [-15.34; 12.14]  |
| Total (fixed effect)                                            | 20.00 [ 16.08; 23.92]  |
| Total (random effects)                                          | 9.07 [ -9.56; 27.70]   |
| Heterogeneity: $\chi^2_4 = 116.60$ ( $P < .001$ ), $I^2 = 97\%$ |                        |

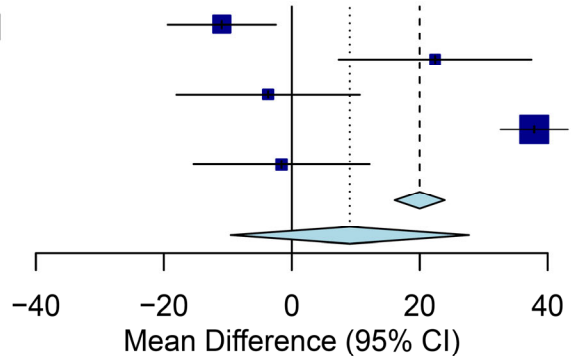

**eFigure 7.** Results of Random-Effects Meta-analysis Examining the Mean Difference of Total Cholesterol Levels Between Autistic and Nonautistic Individuals

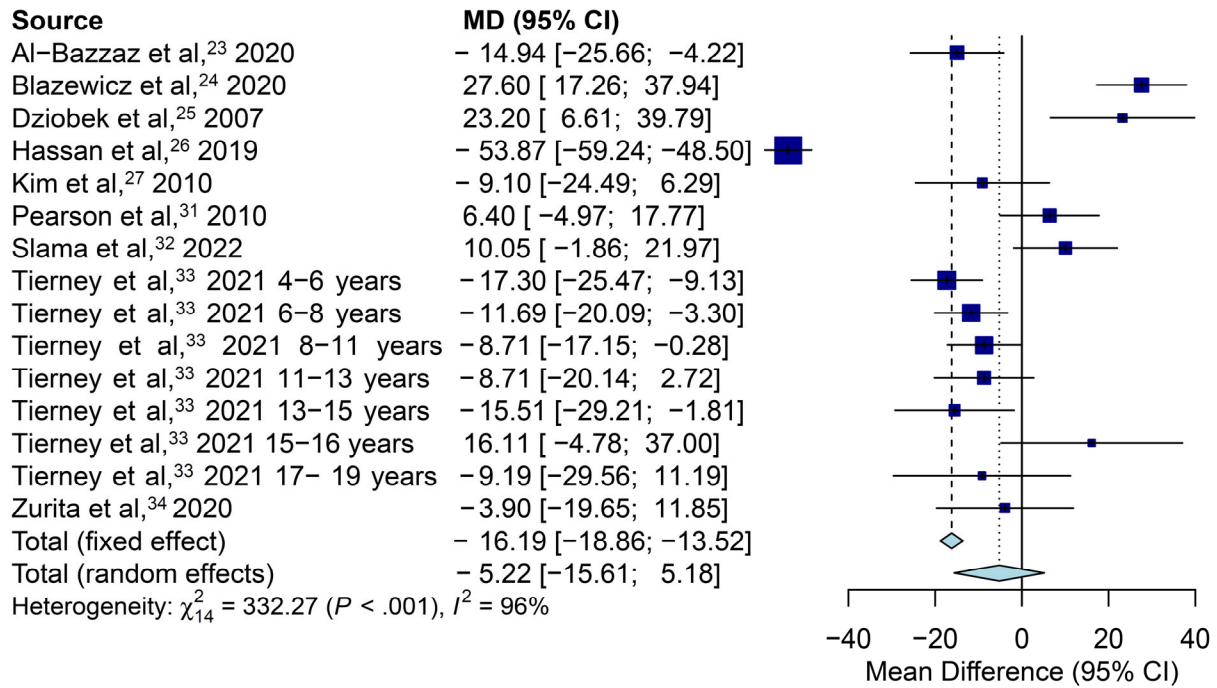

## eReferences

1. Akobirshoev I, Mitra M, Dembo R, Lauer E. In-hospital mortality among adults with autism spectrum disorder in the United States: A retrospective analysis of US hospital discharge data. *Autism*. 2020;24(1):177-189.
2. Alabaf S, Gillberg C, Lundström S, et al. Physical health in children with neurodevelopmental disorders. *J Autism Dev Disord*. 2019;49(1):83-95.
3. Brooks JD, Bronskill SE, Fu L, et al. Identifying children and youth with autism Spectrum disorder in electronic medical records: Examining health system utilization and comorbidities. *Autism Res*. 2021;14(2):400-410.
4. Chen C-Y, Chen K-H, Liu C-Y, Huang S-L, Lin K-M. Increased risks of congenital, neurologic, and endocrine disorders associated with autism in preschool children: cognitive ability differences. *J Pediatr*. 2009;154(3):345-350. e1.
5. Chen M-H, Su T-P, Chen Y-S, et al. Comorbidity of allergic and autoimmune diseases in patients with autism spectrum disorder: A nationwide population-based study. *Res Autism Spectr Disord*. 2013;7(2):205-212.
6. Chen M-H, Lan W-H, Hsu J-W, et al. Risk of developing type 2 diabetes in adolescents and young adults with autism spectrum disorder: a nationwide longitudinal study. *Diabetes care*. 2016;39(5):788-793.
7. Croen LA, Zerbo O, Qian Y, et al. The health status of adults on the autism spectrum. *Autism*. 2015;19(7):814-823.
8. Davignon MN, Qian Y, Massolo M, Croen LA. Psychiatric and medical conditions in transition-aged individuals with ASD. *Pediatrics*. 2018;141(Supplement\_4):S335-S345.

9. Gurney JG, McPheeters ML, Davis MM. Parental report of health conditions and health care use among children with and without autism: National Survey of Children's Health. *Arch Pediatr Adolesc Med*. 2006;160(8):825-830.
10. Hand BN, Angell AM, Harris L, Carpenter LA. Prevalence of physical and mental health conditions in Medicare-enrolled, autistic older adults. *Autism*. 2020;24(3):755-764.
11. Kohane IS, McMurry A, Weber G, et al. The co-morbidity burden of children and young adults with autism spectrum disorders. *PloS One*. 2012;7(4):e33224.
12. Mouridsen SE, Rich B, Isager T. Diseases of the circulatory system among adult people diagnosed with infantile autism as children: A longitudinal case control study. *Research in Developmental Disabilities*. 2016;57:193-200.
13. Nugent JT, Bakhoun C, Ghazi L, Greenberg JH. Screening for Hypertension in Children With and Without Autism Spectrum Disorder. *JAMA Netw Open*. 2022;5(4):e226246-e226246.
14. Schott W, Tao S, Shea L. Co-occurring conditions and racial-ethnic disparities: Medicaid enrolled adults on the autism spectrum. *Autism Res*. 2022;15(1):70-85.
15. Shedlock K, Susi A, Gorman GH, Hisle-Gorman E, Erdie-Lalena CR, Nylund CM. Autism spectrum disorders and metabolic complications of obesity. *J Pediatr*. 2016;178:183-187. e1.
16. Supekar K, Iyer T, Menon V. The influence of sex and age on prevalence rates of comorbid conditions in autism. *Autism Res*. 2017;10(5):778-789.

17. Tyler CV, Schramm SC, Karafa M, Tang AS, Jain AK. Chronic disease risks in young adults with autism spectrum disorder: forewarned is forearmed. *Am J Intellect Dev Disabil*. 2011;116(5):371-380.
18. Vohra R, Madhavan S, Sambamoorthi U. Comorbidity prevalence, healthcare utilization, and expenditures of Medicaid enrolled adults with autism spectrum disorders. *Autism*. 2017;21(8):995-1009.
19. Flygare Wallén E, Ljunggren G, Carlsson AC, Pettersson D, Wändell P. High prevalence of diabetes mellitus, hypertension and obesity among persons with a recorded diagnosis of intellectual disability or autism spectrum disorder. *J Intellect Disabil Res*. 2018;62(4):269-280.
20. Weir E, Allison C, Warriar V, Baron-Cohen S. Increased prevalence of non-communicable physical health conditions among autistic adults. *Autism*. 2021;25(3):681-694.
21. Weiss JA, Isaacs B, Diepstra H, et al. Health concerns and health service utilization in a population cohort of young adults with autism spectrum disorder. *J Autism Dev Disord*. 2018;48(1):36-44.
22. Zerbo O, Leong A, Barcellos L, Bernal P, Fireman B, Croen LA. Immune mediated conditions in autism spectrum disorders. *Brain Behav Immun*. 2015;46:232-236.
23. Al-Bazzaz A, Kahtan A, Almashhadani A, Al-Ani I. Estimation of fasting serum levels of glucose, zinc, copper, zinc/copper ratio and their relation to the measured lipid profile in autistic patients and non-autistic controls in Jordan. *Biomed Pharm J*. 2020;13(1):481-488.

24. Błażewicz A, Szymańska I, Astel A, Stenzel-Bembenek A, Dolliver WR, Makarewicz A. Assessment of changes over time of lipid profile, c-reactive protein level and body mass index in teenagers and young adults on different diets belonging to autism spectrum disorder. *Nutrients*. 2020;12(9):2594.
25. Dziobek I, Gold SM, Wolf OT, Convit A. Hypercholesterolemia in Asperger syndrome: Independence from lifestyle, obsessive–compulsive behavior, and social anxiety. *Psychiatry Res*. 2006;149(1):321-324. doi:10.1016/j.psychres.2006.02.003
26. Hassan MH, Desoky T, Sakhr HM, Gabra RH, Bakri AH. Possible metabolic alterations among autistic male children: clinical and biochemical approaches. *J Mol Neurosci*. 2019;67(2):204-216.
27. Kim E-K, Neggers YH, Shin C-S, Kim E, Kim EM. Alterations in lipid profile of autistic boys: a case control study. *Nutr Res*. 2010;30(4):255-260.
28. Kwon SJ, Hong K-W, Choi S, et al. Association of 3-hydroxy-3-methylglutaryl-coenzyme A reductase gene polymorphism with obesity and lipid metabolism in children and adolescents with autism spectrum disorder. *Metab Brain Dis*. 2022;37(2):319-328.
29. Manco M, Guerrera S, Ravà L, et al. Cross-sectional investigation of insulin resistance in youths with autism spectrum disorder. Any role for reduced brain glucose metabolism? *Transl Psychiatry*. 2021;11(1):1-8.
30. Moses L, Katz N, Weizman A. Metabolic profiles in adults with autism spectrum disorder and intellectual disabilities. *Eur Psychiatry*. 2014;29(7):397-401.
31. Pearson J. *Disordered Cholesterol Metabolism in Autism Spectrum Disorders: Sterol and Genetic Analyses: a Thesis*. Oregon Health & Science University; 2010.

32. Slama S, Bahia W, Soltani I, Gaddour N, Ferchichi S. Risk factors in autism spectrum disorder: A Tunisian case-control study. *Saudi J Biol Sci.* 2022;29(4):2749-2755.
33. Tierney E, Remaley AT, Thurm A, et al. Sterol and lipid analyses identifies hypolipidemia and apolipoprotein disorders in autism associated with adaptive functioning deficits. *Transl Psychiatry.* 2021;11(1):1-13.
34. Zurita MF, Cárdenas PA, Sandoval ME, et al. Analysis of gut microbiome, nutrition and immune status in autism spectrum disorder: a case-control study in Ecuador. *Gut Microbes.* 2020;11(3):453-464.
