# Supplementary material
Source: PubMed Central journal article supplement (PMC9887535)
Supplement: jamapediatr-e225629-s002.pdf [file jamapediatr-e225629-s002.pdf]

## Data Sharing Statement

Dhanasekara. Association Between Autism Spectrum Disorders and Cardiometabolic Diseases. *JAMA Pediatr.* Published January 30, 2023. doi:10.1001/jamapediatrics.2022.5629

### Data

**Data available:** Yes

**Data types:** Other (please specify)

**Additional Information:** Data extracted from published articles to conduct the systematic review and meta-analyses / meta-regression analyses.

**How to access data:** [chanaka.kahathuduwa@ttuhsc.edu](mailto:chanaka.kahathuduwa@ttuhsc.edu)

**When available:** With publication

### Supporting Documents

**Document types:** None

### Additional Information

**Who can access the data:** Researchers and clinicians with an institutional affiliation requesting the data.

**Types of analyses:** For any purpose.

**Mechanisms of data availability:** Without investigator support
